# Supplementary material
Source: PubMed Central journal article supplement (PMC2689948)
Supplement: pp.109.136739_1.pdf [file pp.109.136739_1.pdf]

## Figure S1

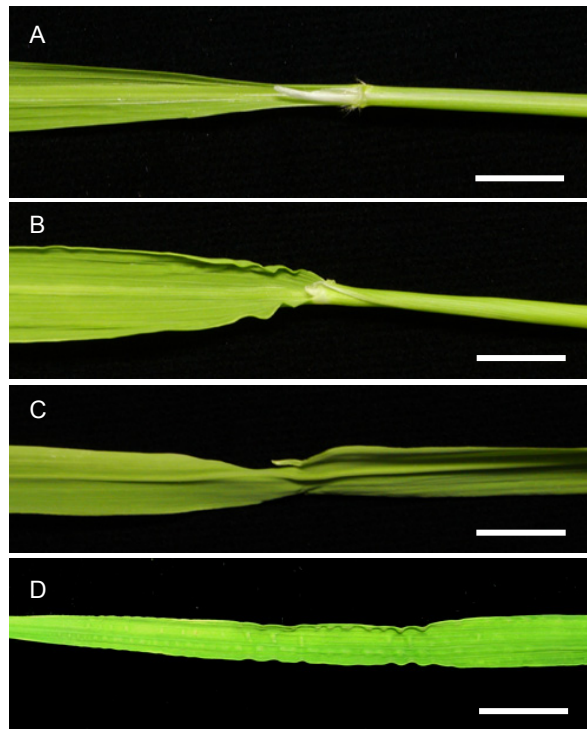

### Supplementary Data

**Supplementary Figure 1.** Effects of ectopic *APO1* expression on leaf development. A; A leaf of a control, non-transformed plant. B to D; Leaves of *35S::APO1* plants. A wrinkly leaf (B), a leaf with an indentation (C), and a leaf with lumpy surface (D). bars = 1 cm.
